# Supplementary material for: Effect of doxorubicin on viability and Bax, Bcl-2, p53, Nanog, Sox-2, Oct-4 gene expressions in MCF-7 stem-like cells
Source: Research Square preprint supplement (doi:10.21203/rs.3.rs-2677263/v1), 2023-03-31
Supplement: Supplementary file 1 [file 3511b6f55fafa9ad6a35d8f4.docx]

**TABLES AND LEGENDS**

**Table 1.** List of genes with their forward and reverse primer sequences used for the gene expression analysis by RT-qPCR (Sequences were obtained from the LifeScience-Roche Universal ProbeLibrary Assay Design Center website)

**-----------------------------------------------------------------------------------------------------------------**

**Gene Forward Primer Reverse** **Primer**

GAPDH ACGGGAAGCTTGTCATCAAT CATCGCCCCACTTGATTTT

Bax CAAGACCAGGGTGGTTGG CACTCCCGCCACAAAGAT

Bcl-2 CCTGTGGATGACTGAGTACC GAGACAGCCAGGAGAAATCA

P53 TCACACCTGTAATCCCAGCTAC CTCTGCCTCCTGGGTTCA

Nanog GGGAAAAAGCCAGAAGTCG CTTTGGGGACAAGCTGGA Oct-4 (*pou5f1*) GAAACCCACACTGCAGATCA CGGTTACAGAACCACACTCG

Sox-2 TCTCAGCTCACTGCAACCTC GTGGCACGCACCTGTAATC

**-----------------------------------------------------------------------------------------------------------------**

**Table 2.** Viable CD44+/CD24¯/low stem cell percent ratios (%) determined by flow cytometry for DOX [IC50] treated MCF-10A and MCF-7 cells.

-----------------------------------------------------------------------------------------------------------------

MCF-10A (CD44+/CD24¯/low) MCF-7 (CD44+/CD24¯/low)

------------------------------------ ---------------------------------------

Viable stem cells (%) *P* Viable stem cells (%) *P*

-----------------------------------------------------------------------------------------------------------------

Control (no drugs) 0.7 - 2.7 -

DOX [IC50] 3.3 < 0.05 4.2 < 0.05

-----------------------------------------------------------------------------------------------------------------

**Table 3.** Annexin-V and PI flow cytometry results for DOX [IC50] treated MCF-10A and MCF-7 cells. Necrotic cells are Annexin-V-/PI+ cells, as determined by Flow Cytometry, dead (late apoptotic) cells are Annexin-V+/PI+ cells, viable cells are Annexin-V-/PI- cells, and apoptotic (early) cells are Annexin-V+/PI- cells.

----------------------------------------------------------------------------------------------------------------------------

MCF-10A cell line

---------------------------------------------------------------------------------------------------

apoptotoic (%) necrotic (%) dead (%) viable (%)

----------------------------------------------------------------------------------------------------------------------------

Control (no drugs) 4.7 4.6 7.2 83.5

DOX [IC50] 20.8 (*P* < 0.05) 8.2 (*P* < 0.05) 9.0 (*P* < 0.05) 62.0 (*P* < 0.05)

----------------------------------------------------------------------------------------------------------------------------

MCF-7 cell line

---------------------------------------------------------------------------------------------------

apoptotoic (%) necrotic (%) dead (%) viable (%)

----------------------------------------------------------------------------------------------------------------------------

Control (no drugs) 6.7 14.1 4.8 74.4

DOX [IC50] 15.5 (*P* < 0.05) 20.8 (*P* < 0.05) 1 9.2 (*P* < 0.05) 44.5 (*P* < 0.05)

----------------------------------------------------------------------------------------------------------------------------
